# Supplementary material for: Recent Recombination Events in the Core Genome Are Associated with Adaptive Evolution in Enterococcus faecium
Source: PubMed Central journal article supplement — Genome Biol Evol. 2013 Jul 23;5(8):1524–35. doi: 10.1093/gbe/evt111 (PMC3762198; doi:10.1093/gbe/evt111), 2013-07-23
Supplement: supp_evt111_MdeBeen_ea_Figure_S2.pdf [file supp_evt111_MdeBeen_ea_Figure_S2.pdf]

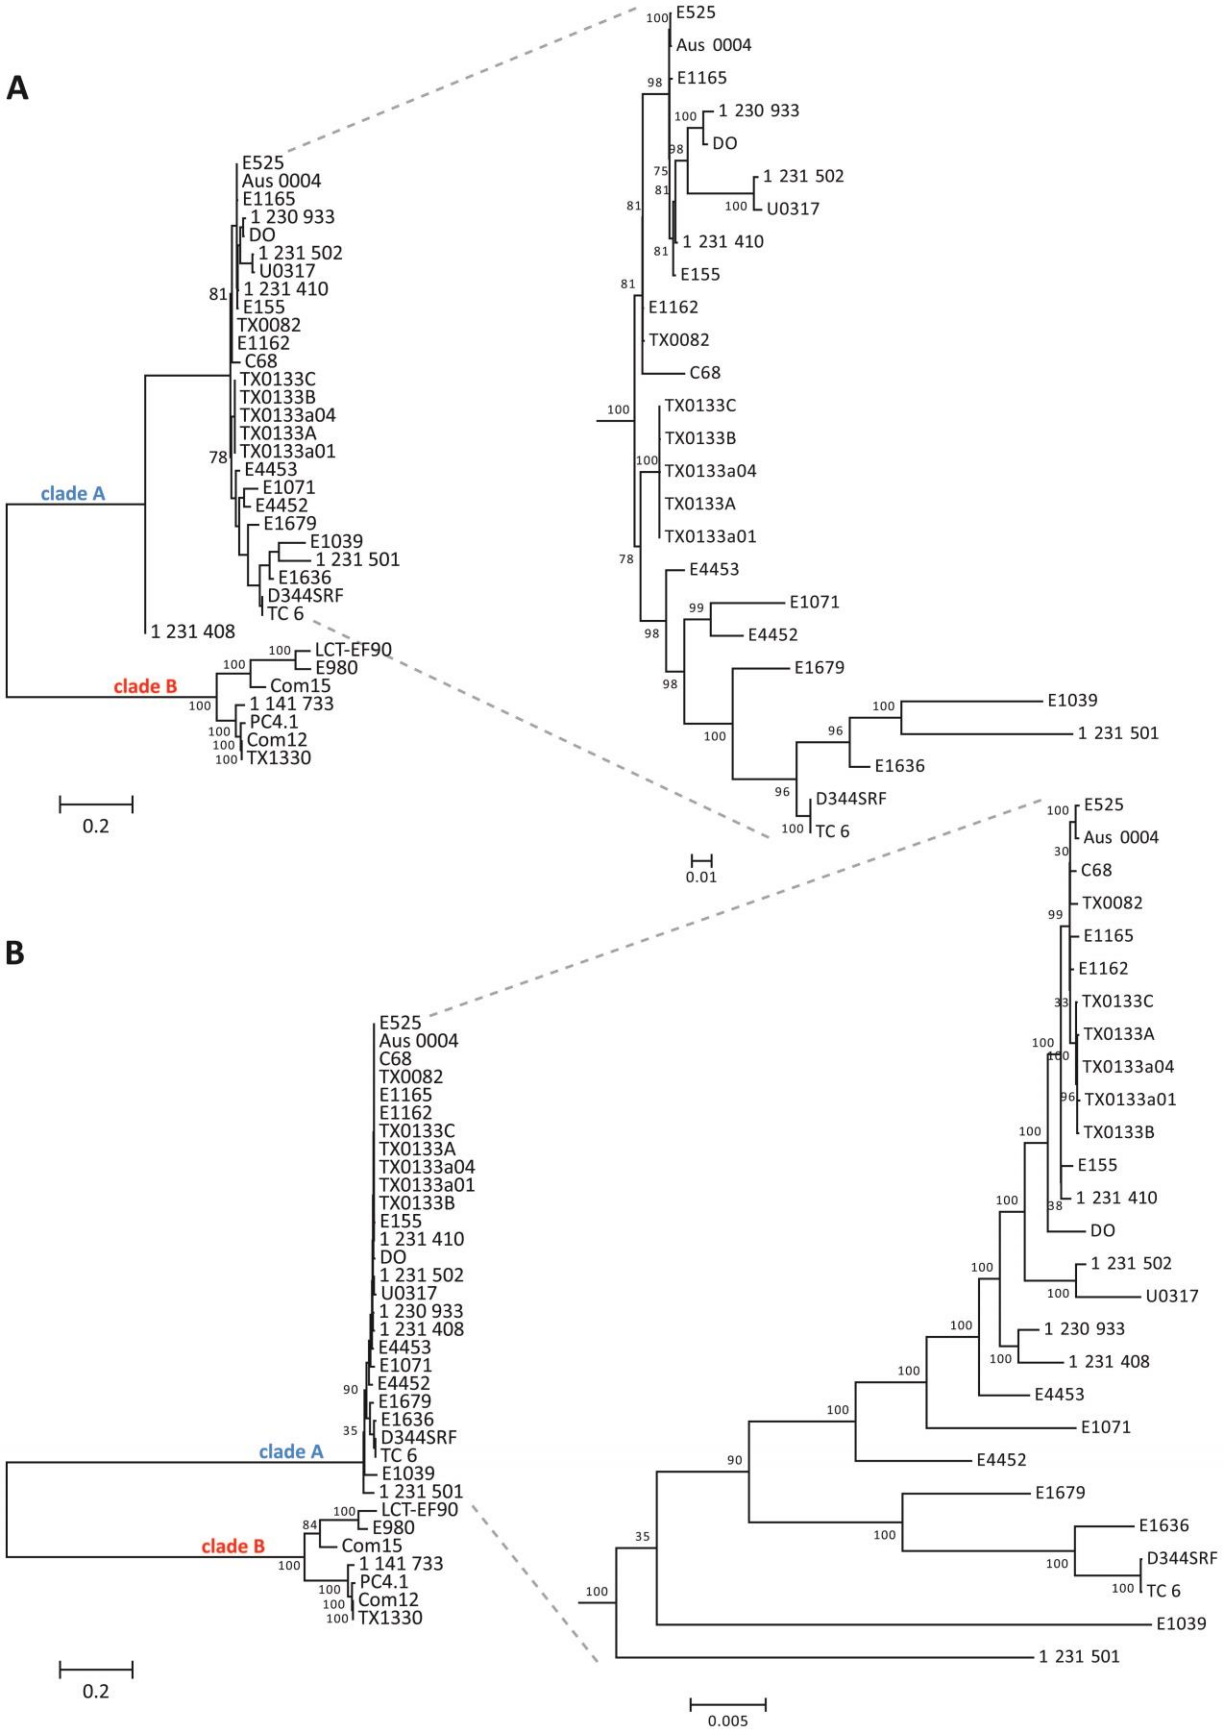

**Fig. S2.** Impact of recombination on *E. faecium* phylogeny. Trees on the left are the same as in Fig. 1: (A) no recombination filtering was applied; (B) tree was filtered for recombination. Relevant bootstrap supports for clade A are depicted in the right (zoom-in) trees.
