# Supplementary material for: Recent Recombination Events in the Core Genome Are Associated with Adaptive Evolution in Enterococcus faecium
Source: PubMed Central journal article supplement — Genome Biol Evol. 2013 Jul 23;5(8):1524–35. doi: 10.1093/gbe/evt111 (PMC3762198; doi:10.1093/gbe/evt111), 2013-07-23
Supplement: supp_evt111_MdeBeen_ea_Figure_S4.pdf [file supp_evt111_MdeBeen_ea_Figure_S4.pdf]

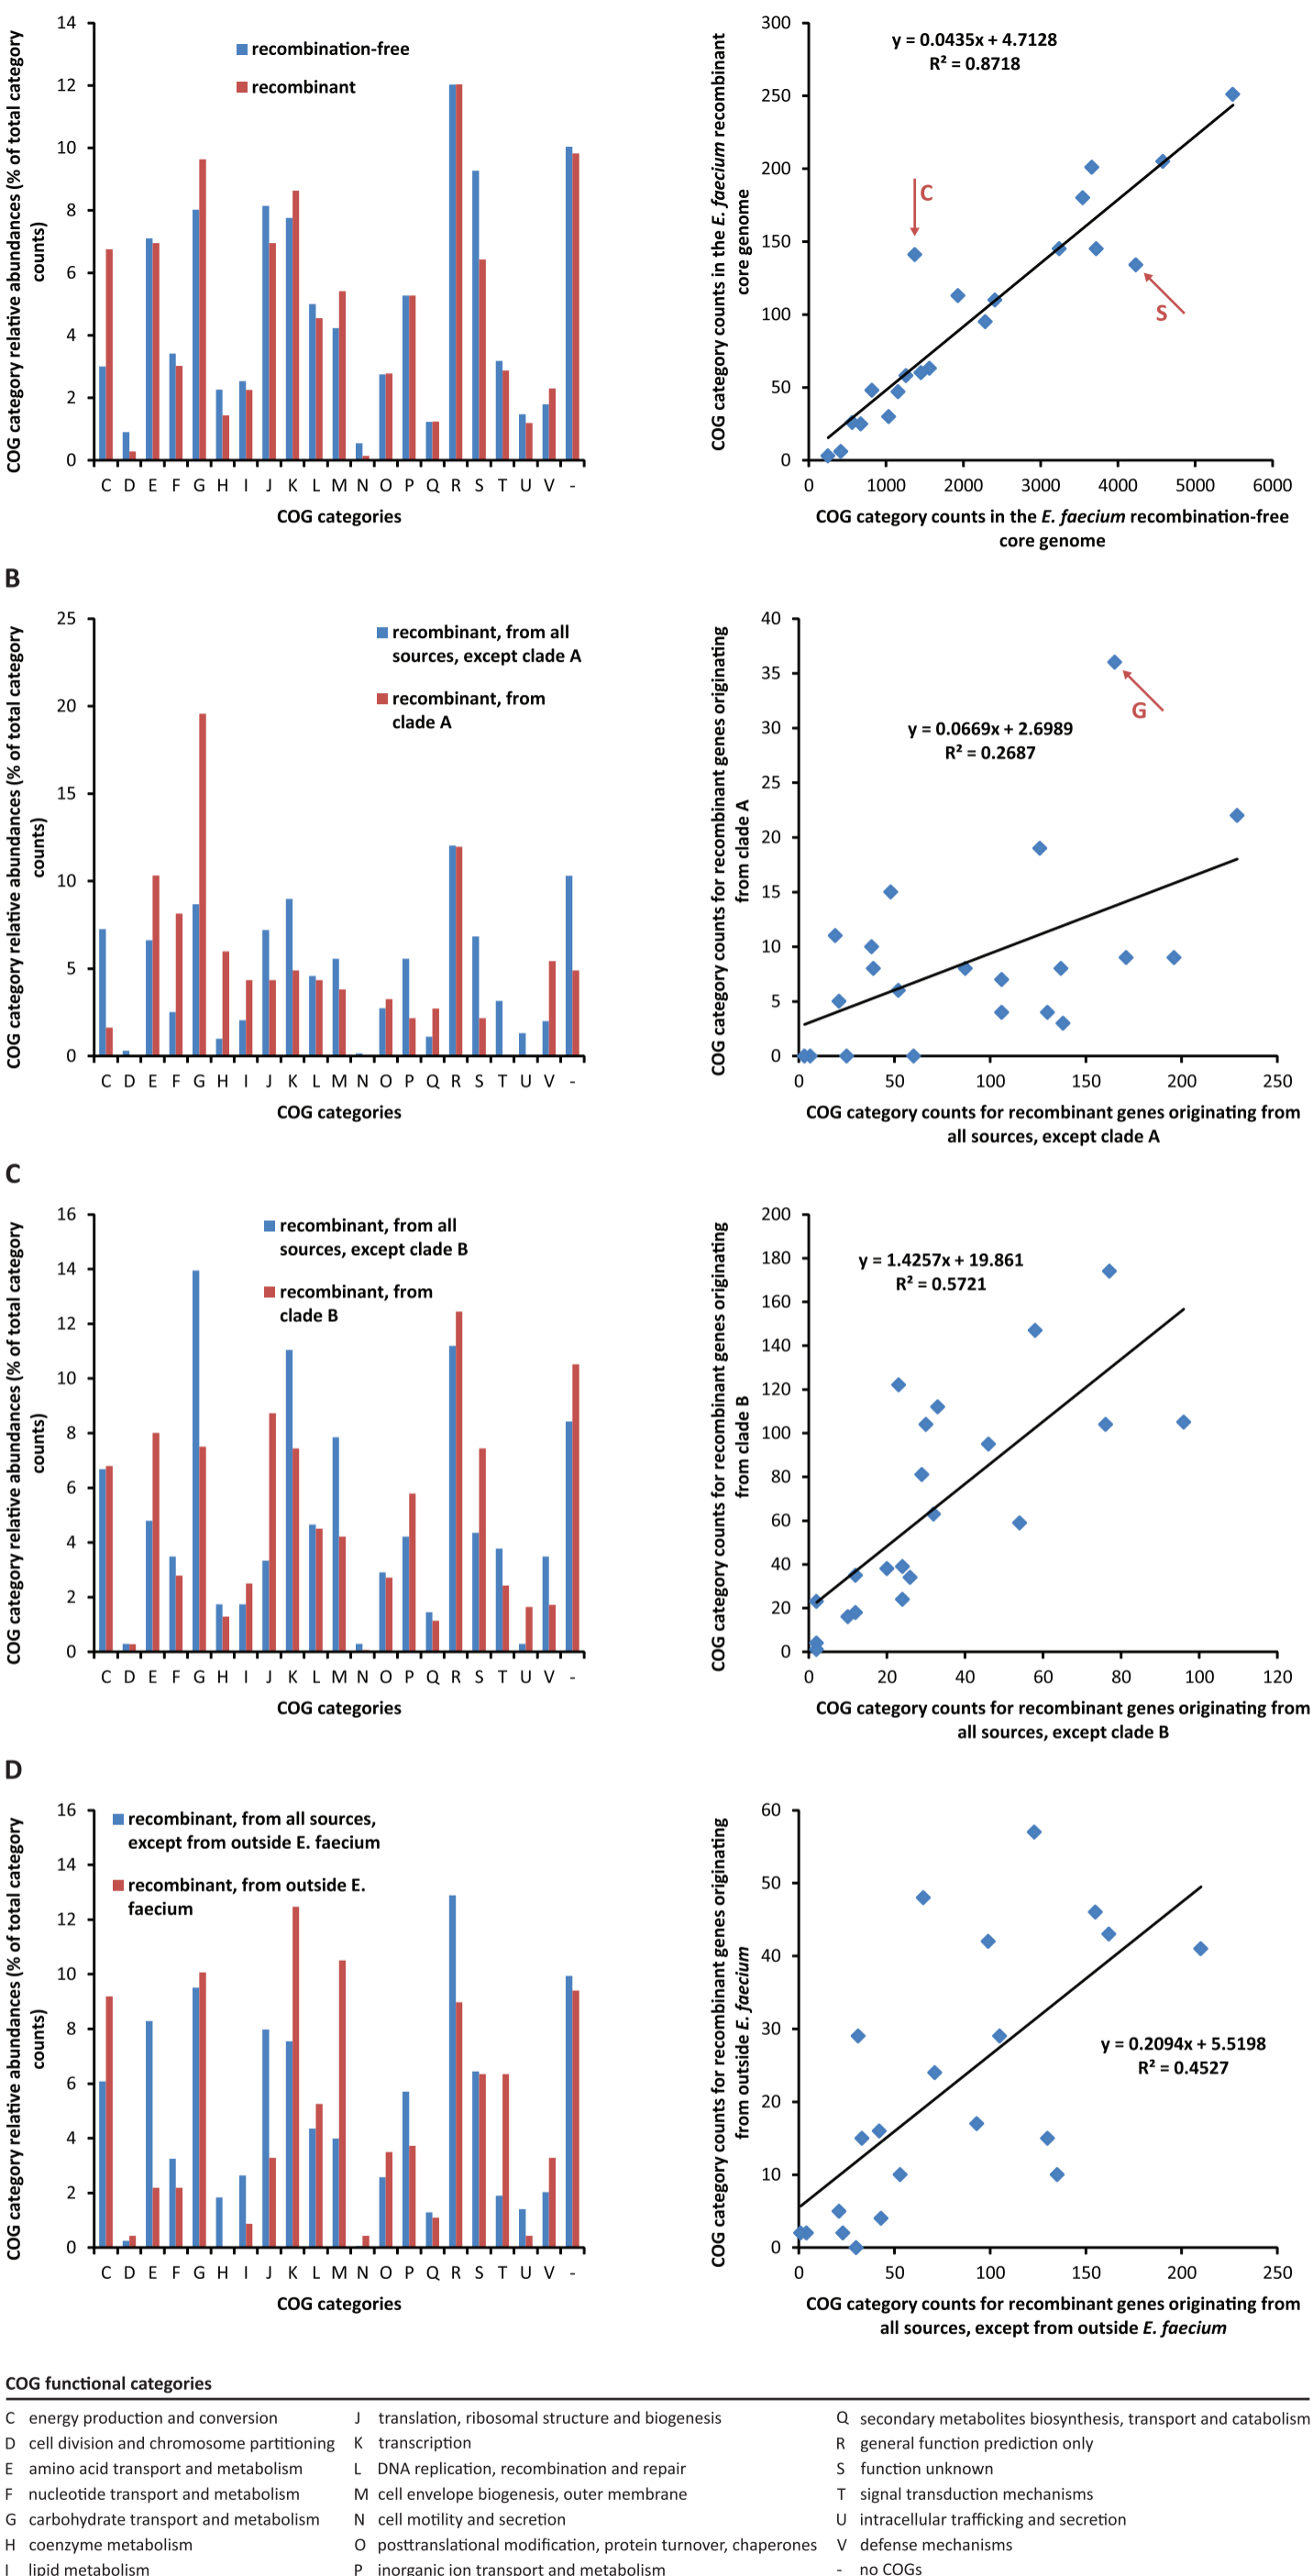

**Fig. S4.** Comparison of the functional gene category compositions of (A) the *E. faecium* recombination-free versus the recombinant core genome and of (B-D) the recombinant core genome originating from a specific source versus that of all sources, except the corresponding specific source. The specific sources that were analysed were: clade A, clade B and outside *E. faecium* (panels B-D, respectively). Left panels show bar charts of COG category relative abundances (% of total category counts); right panels show scatterplots of COG category counts. Outliers of the regression lines were identified using Grubb's test (99% confidence level) and are indicated with red arrows and letters.
