# Supplementary material for: Recent Recombination Events in the Core Genome Are Associated with Adaptive Evolution in Enterococcus faecium
Source: PubMed Central journal article supplement — Genome Biol Evol. 2013 Jul 23;5(8):1524–35. doi: 10.1093/gbe/evt111 (PMC3762198; doi:10.1093/gbe/evt111), 2013-07-23
Supplement: supp_evt111_MdeBeen_ea_Figure_S5.pdf [file supp_evt111_MdeBeen_ea_Figure_S5.pdf]

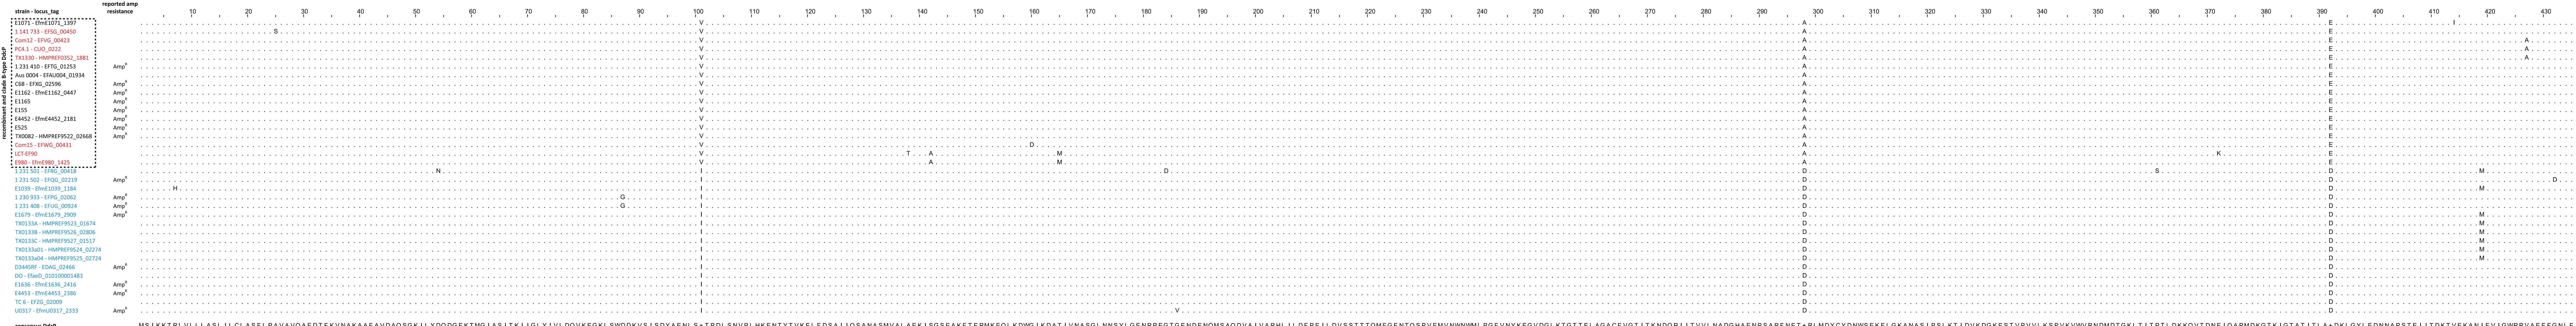

**Fig. S5.** Multiple sequence alignment of the *E. faecium* core genomic ampicillin resistance determinant DdcP. Strain names and available locus tags are shown to the left, followed by reported ampicillin resistance (Amp<sup>R</sup>). Clade B strains are shown in red, clade A strains with a predicted recombinant DdcP are shown in black, all other clade A strains are shown in blue. The DdcP multiple sequence alignment is shown to the right: only variable amino acid positions are shown. The consensus DdcP sequence is shown in the bottom.
