# Supplementary material for: Recent Recombination Events in the Core Genome Are Associated with Adaptive Evolution in Enterococcus faecium
Source: PubMed Central journal article supplement — Genome Biol Evol. 2013 Jul 23;5(8):1524–35. doi: 10.1093/gbe/evt111 (PMC3762198; doi:10.1093/gbe/evt111), 2013-07-23
Supplement: supp_evt111_MdeBeen_ea_Table_S1.pdf [file supp_evt111_MdeBeen_ea_Table_S1.pdf]

**Table S1.** Sequence assembly statistics for newly sequenced *E. faecium* strains

| Strain | k  | Assembly size (Mbp) | Largest scaffold (bp) | N50 (bp) | Nr of scaffolds | Average Nt coverage |
|--------|----|---------------------|-----------------------|----------|-----------------|---------------------|
| E155   | 35 | 3.09                | 153,272               | 46,336   | 242             | 79                  |
| E525   | 37 | 2.93                | 143,241               | 43,370   | 241             | 69                  |
| E1165  | 31 | 2.81                | 93,227                | 40,594   | 185             | 117                 |

Assembly statistics are based on scaffolds of size  $\geq 200$  bp.
